# Supplementary material
Source: Springer Nature journal article supplement (https://www.springermedizin.de/resource/supplementary/12931_2013_1414_MOESM3_ESM.pdf/9425950)

**A****Contractile Force  
(%, Normalized)**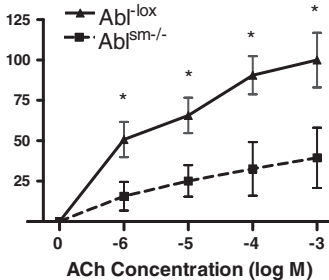**B****Contractile Force  
(Normalized)**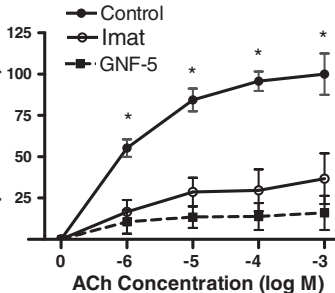**C****Relative Force  
(Normalized, %)**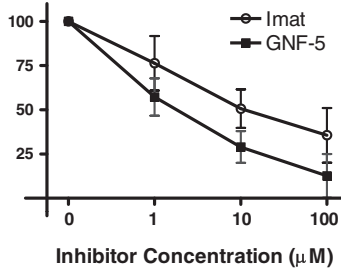

Supplement: MOESM3 [file 9425950]
